# Supplementary material for: Synthesis and characterization of the rare-earth Dion–Jacobson layered perovskites, APrNb2O7 (A = Rb, Cs and CuCl)
Source: Royal Society of Chemistry journal article supplement (doi:10.1039/c4dt03882g), 2015-01-01
Supplement: c4dt03882g1.pdf [file c4dt03882g1.pdf]

Electronic Supplementary Material (ESI) for Dalton Transactions.  
This journal is © The Royal Society of Chemistry 2015

## Supporting Information

### Synthesis and Characterization of the Rare-Earth Dion-Jacobson Layered Perovskites, $A\text{PrNb}_2\text{O}_7$ ( $A = \text{Rb}, \text{Cs}$ and $\text{CuCl}$ )

Dariusz Montasserasadi,<sup>a,b</sup> Mark Granier,<sup>a,b</sup> Leonard Spinu,<sup>b,c</sup> Satish Chandra Rai,<sup>c</sup> Weilie Zhou,<sup>c</sup> and John B. Wiley<sup>a,b,\*</sup>

<sup>a</sup>Department of Chemistry, <sup>b</sup>Advanced Materials Research Institute, <sup>c</sup> Department of Physics  
University of New Orleans, New Orleans, LA 70148-2820, United States

|                                                                                                                                                                        | Page |
|------------------------------------------------------------------------------------------------------------------------------------------------------------------------|------|
| Fig. S1: XRD $\text{RbPrNb}_2\text{O}_7$ prepared with $\text{Pr}_6\text{O}_{11}$ in a $\text{RbCl}$ flux and $\text{Pr}_2\text{O}_3$ in an $\text{O}_2$ atmosphere    | S2   |
| Fig. S2: XRD $(\text{CuCl})\text{PrNb}_2\text{O}_7$ prepared from $\text{RbPrNb}_2\text{O}_7$ and $\text{CsPrNb}_2\text{O}_7$                                          | S3   |
| Fig. S3: XRD $(\text{CuCl})\text{PrNb}_2\text{O}_7$ prepared from $A\text{PrNb}_2\text{O}_7$ ( $A = \text{Li}, \text{Rb}$ ) and $\text{CuCl}_2$                        | S4   |
| Fig. S4: Refinement of $\text{RbPrNb}_2\text{O}_7$ in $P4/mmm$ space group                                                                                             | S5   |
| Fig. S5: Refinement of $\text{CsPrNb}_2\text{O}_7$ in $P4/mmm$ space group                                                                                             | S6   |
| Tables S1-S3: Crystal information for $\text{CsPrNb}_2\text{O}_7$                                                                                                      | S7   |
| Fig. S6: Structure of $\text{CsPrNb}_2\text{O}_7$                                                                                                                      | S8   |
| Fig. S7: TEM, ED, and elemental analysis for $\text{CsPrNb}_2\text{O}_7$ , $\text{RbPrNb}_2\text{O}_7$ , and elemental analysis $(\text{CuCl})\text{PrNb}_2\text{O}_7$ | S9   |
| Fig. S8: Magnetic properties of $\text{CsPrNb}_2\text{O}_7$                                                                                                            | S10  |
| Fig. S9: $M(H)$ versus temperature for $\text{RbPrNb}_2\text{O}_7$                                                                                                     | S11  |
| Fig. S10: $M(H)$ versus temperature for $(\text{CuCl})\text{PrNb}_2\text{O}_7$                                                                                         | S11  |
| Fig. S11: UV absorption spectrum of the $(\text{CuCl})\text{PrNb}_2\text{O}_7$                                                                                         | S12  |
| Fig. S12: Refinement of $(\text{CuCl})\text{PrNb}_2\text{O}_7$ in $P4/mmm$                                                                                             | S13  |
| Fig. S13: XRD of $(\text{CuCl})\text{PrNb}_2\text{O}_7$ after TGA/DTA                                                                                                  | S14  |

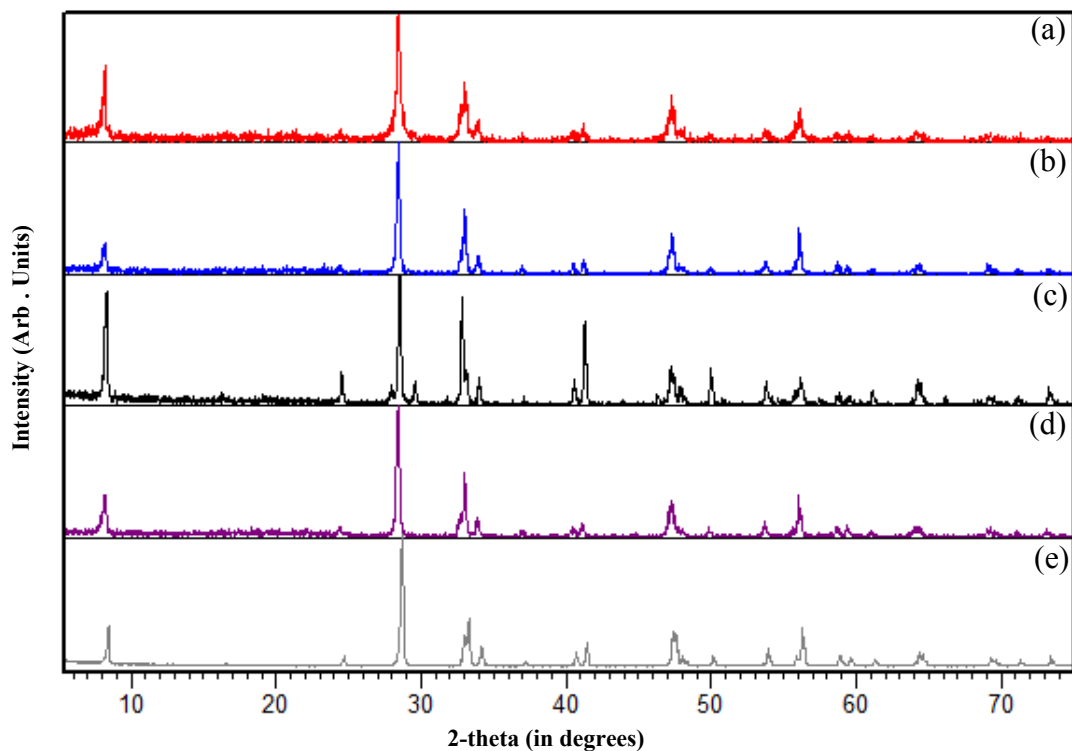

**Fig. S1:** XRDs of  $\text{RbPrNb}_2\text{O}_7$  prepared from molten salt  $\text{RbCl}$  and from  $\text{Pr}_2\text{O}_3$  and  $\text{O}_2$ . (a-c)  $\frac{1}{2} \text{Rb}_2\text{CO}_3 : \frac{1}{6} \text{Pr}_6\text{O}_{11} : \text{Nb}_2\text{O}_5 : 5 \text{RbCl}$  -temperature  $1050^\circ\text{C}$  2hrs -temperature  $1060^\circ\text{C}$  2 hrs -temperature  $1200^\circ\text{C}$  2 hrs (d)  $\frac{1}{2} \text{Rb}_2\text{CO}_3 : \frac{1}{2} \text{Pr}_2\text{O}_3 : \text{Nb}_2\text{O}_5 + \text{O}_2$  temperature  $1000^\circ\text{C}$  6.5hrs (e)  $\frac{1}{2} \text{Rb}_2\text{CO}_3 : \frac{1}{6} \text{Pr}_6\text{O}_{11} : \text{Nb}_2\text{O}_5$  temperature  $1100^\circ\text{C}$  2 days.

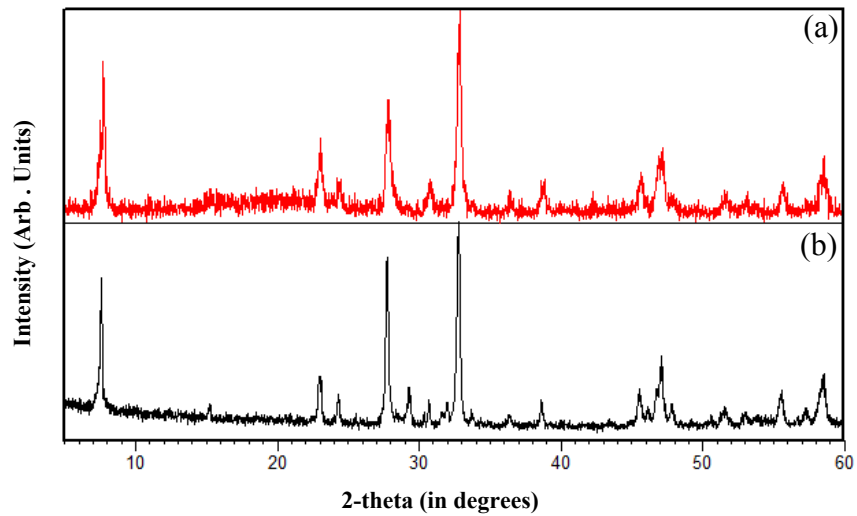

**Fig. S2:** The XRD pattern of (CuCl)PrNb<sub>2</sub>O<sub>7</sub> which has been prepared from (a) RbPrNb<sub>2</sub>O<sub>7</sub> at 325 °C over 7 days and (b) CsPrNb<sub>2</sub>O<sub>7</sub> 340 °C over 7 days.

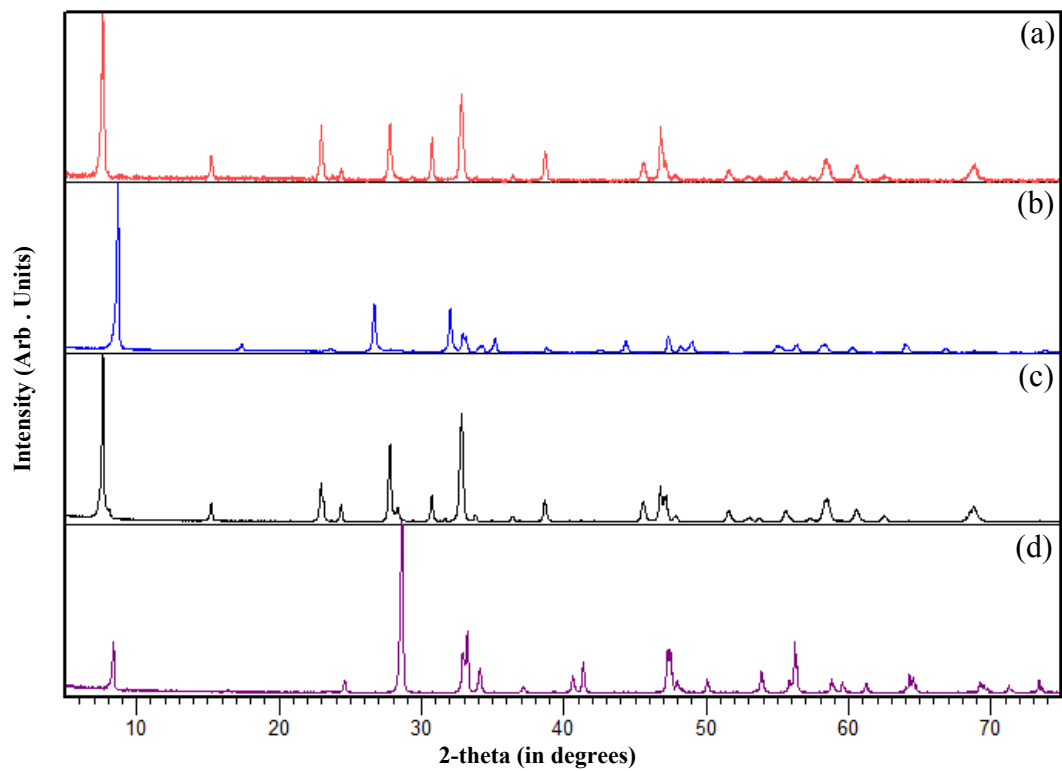

**Fig. S3:** XRD  $(\text{CuCl})\text{PrNb}_2\text{O}_7$  prepared from  $\text{LiPrNb}_2\text{O}_7$  and  $\text{CuCl}_2$ . (a)  $(\text{CuCl})\text{PrNb}_2\text{O}_7$  ( $\text{LiPrNb}_2\text{O}_7:\text{CuCl}_2$  1:2) at 300 °C, 4 days. (b)  $\text{LiPrNb}_2\text{O}_7$ , (c)  $(\text{CuCl})\text{PrNb}_2\text{O}_7$  prepared from  $\text{RbPrNb}_2\text{O}_7$  355 °C 7 days, and (d)  $\text{RbPrNb}_2\text{O}_7$ .

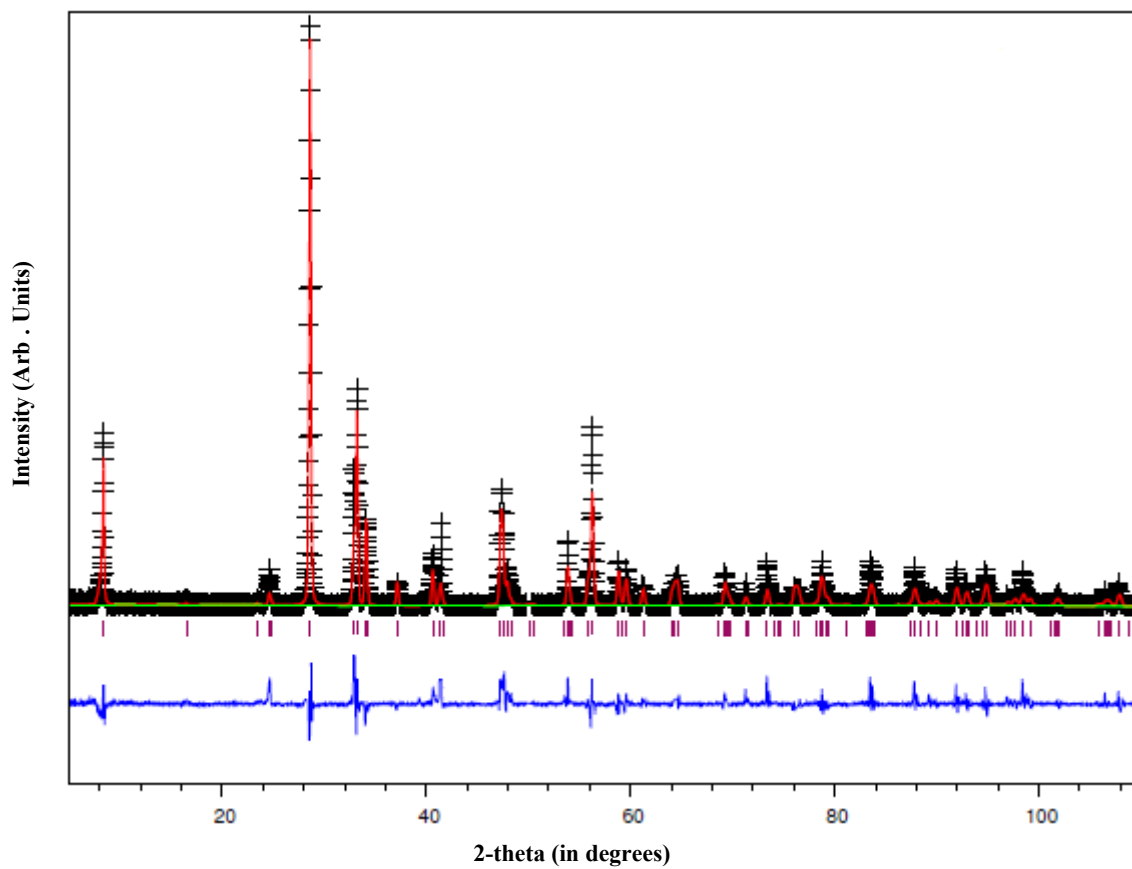

**Fig. S4:** Refinement of RbPrNb<sub>2</sub>O<sub>7</sub> in *P4/mmm* space group ( $R_p = 37.1\%$ ,  $R_{wp} = 27.9\%$ , and  $\chi^2 = 4.946$ ). Orthorhombic model in *Imma* space group was found to be superior.

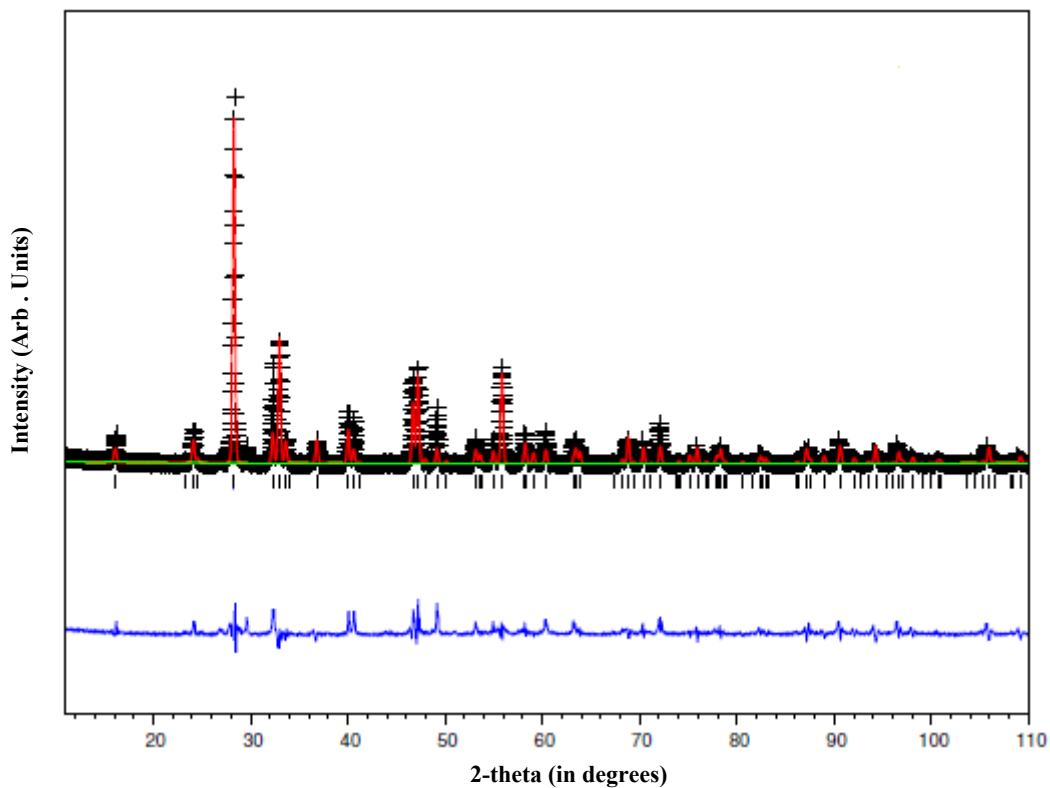

**Fig. S5:** Observed and calculated data for the Rietveld refinement of CsPrNb<sub>2</sub>O<sub>7</sub> in *P4/mmm* space group. Observed data is indicated by crosses, calculated pattern by a (red) solid line, and the bottom (blue) curve is the difference plot. Peak positions are presented as black tic marks. (*Z*=1;  $R_p=13.17\%$   $R_{wp}= 12.26\%$ ;  $\chi^2 = 1.837$ .)

**Table S1:** Crystallographic Data for CsPrNb<sub>2</sub>O<sub>7</sub>.

| Atom           | Site | x   | y   | z         | g       | U <sub>iso</sub> (Å <sup>2</sup> ) |
|----------------|------|-----|-----|-----------|---------|------------------------------------|
| Cs             | 1b   | 0   | 0   | 0.5       | 1.09(8) | 0.023(1)                           |
| Pr             | 1a   | 0   | 0   | 0         | 1.01(9) | 0.012(1)                           |
| Nb             | 2h   | 0.5 | 0.5 | 0.2014(1) | 1.03(9) | 0.011(3)                           |
| O <sub>1</sub> | 4i   | 0   | 0.5 | 0.1671    | 1       | 0.005(5)                           |
| O <sub>2</sub> | 2h   | 0.5 | 0.5 | 0.3692    | 1       | 0.01(2)                            |
| O <sub>3</sub> | 1c   | 0.5 | 0.5 | 0         | 1       | 0.08(2)                            |

Z=1; R<sub>p</sub>=13.17% R<sub>wp</sub>= 12.26% and  $\chi^2 = 1.837$   
 Space group *P4/mmm* a = 3.8668(2), c = 11.163(1) V = 166.92(2) Å<sup>3</sup>

**Table S2:** Bond valence sum results for CsLaNb<sub>2</sub>O<sub>7</sub> and CsPrNb<sub>2</sub>O<sub>7</sub>.

| CsLaNb <sub>2</sub> O <sub>7</sub> |        | CsPrNb <sub>2</sub> O <sub>7</sub> |        |
|------------------------------------|--------|------------------------------------|--------|
| Cs                                 | 0.9876 | Cs                                 | 1.0529 |
| La                                 | 2.8808 | Pr                                 | 3.0805 |
| Nb                                 | 5.2305 | Nb                                 | 5.2374 |

**Table S3:** Selected Bond Lengths Extracted from the Refined Structure of CsPrNb<sub>2</sub>O<sub>7</sub> versus CsLaNb<sub>2</sub>O<sub>7</sub>.

| CsLaNb <sub>2</sub> O <sub>7</sub> |            | CsPrNb <sub>2</sub> O <sub>7</sub> |            |
|------------------------------------|------------|------------------------------------|------------|
| Bond Type                          | Length (Å) | Bond Type                          | Length (Å) |
| Cs-O2 x 8                          | 3.191(4)   | Cs-O2 x 8                          | 3.1673(9)  |
| La-O1 x 8                          | 2.672(4)   | Pr-O1 x 8                          | 2.6021(1)  |
| La-O3 x 4                          | 2.763(1)   | Pr-O3 x 4                          | 2.73427(1) |
| Nb-O1 x 4                          | 1.999(1)   | Nb-O1 x 4                          | 1.9987(6)  |
| Nb-O2 x 1                          | 1.736(7)   | Nb-O2 x 1                          | 1.7350(1)  |
| Nb-O3 x 1                          | 2.248(1)   | Nb-O3 x 1                          | 2.2481(1)  |

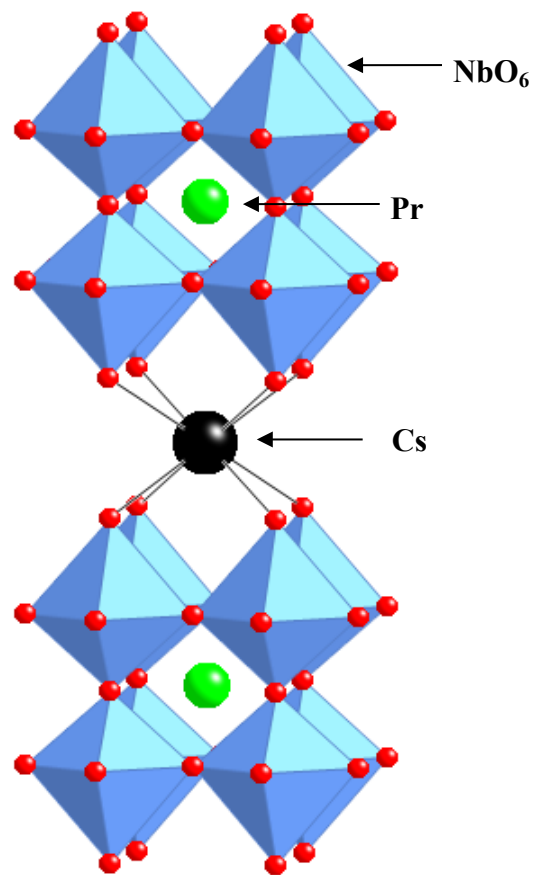

**Fig. S6:** Crystal structure for CsPrNb<sub>2</sub>O<sub>7</sub>.



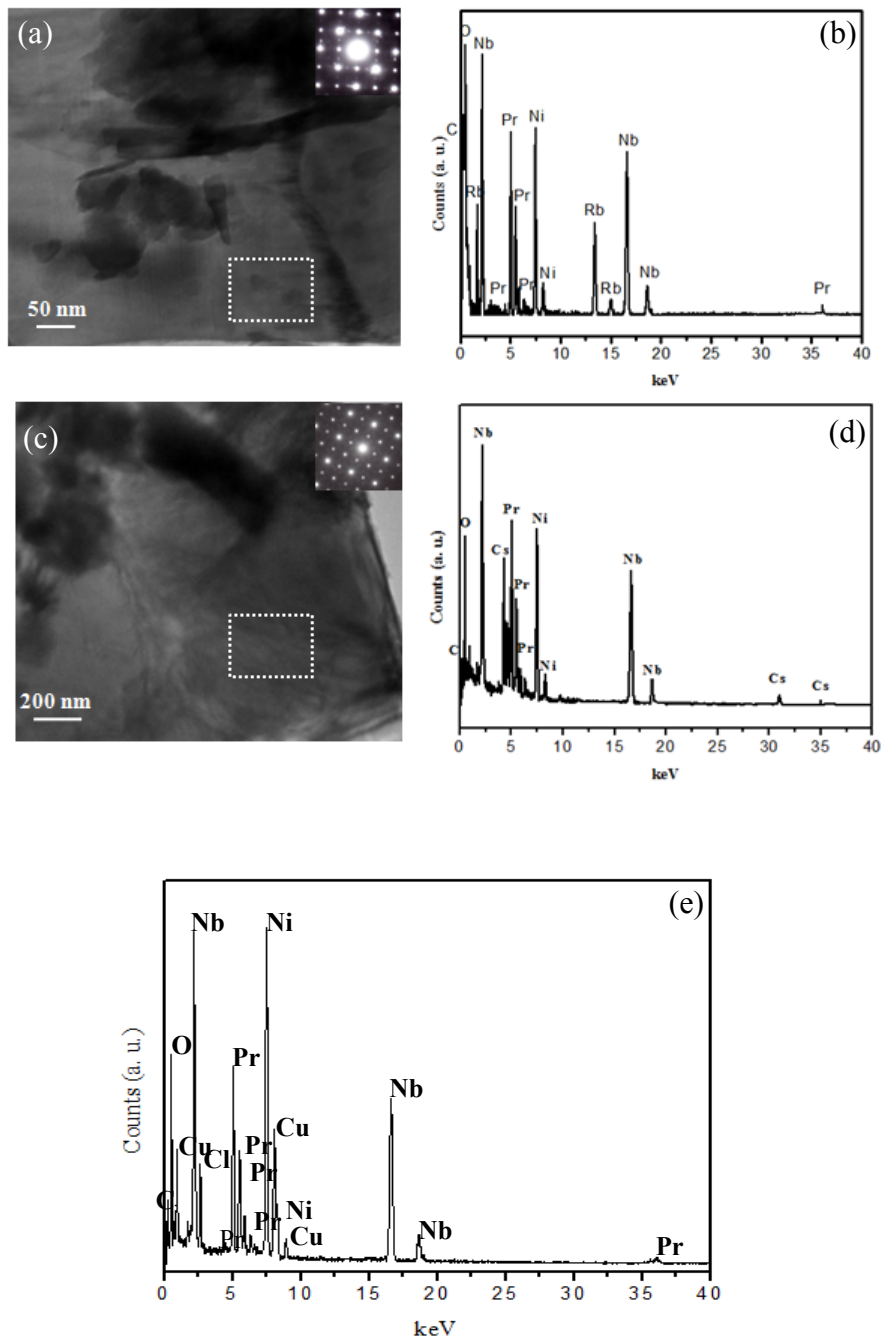

**Fig. S7:** TEM image, SAED and elemental analysis of (a,b) CsPrNb<sub>2</sub>O<sub>7</sub>, (c,d) RbPrNb<sub>2</sub>O<sub>7</sub>, and (e) elemental analysis of (CuCl)PrNb<sub>2</sub>O<sub>7</sub>.

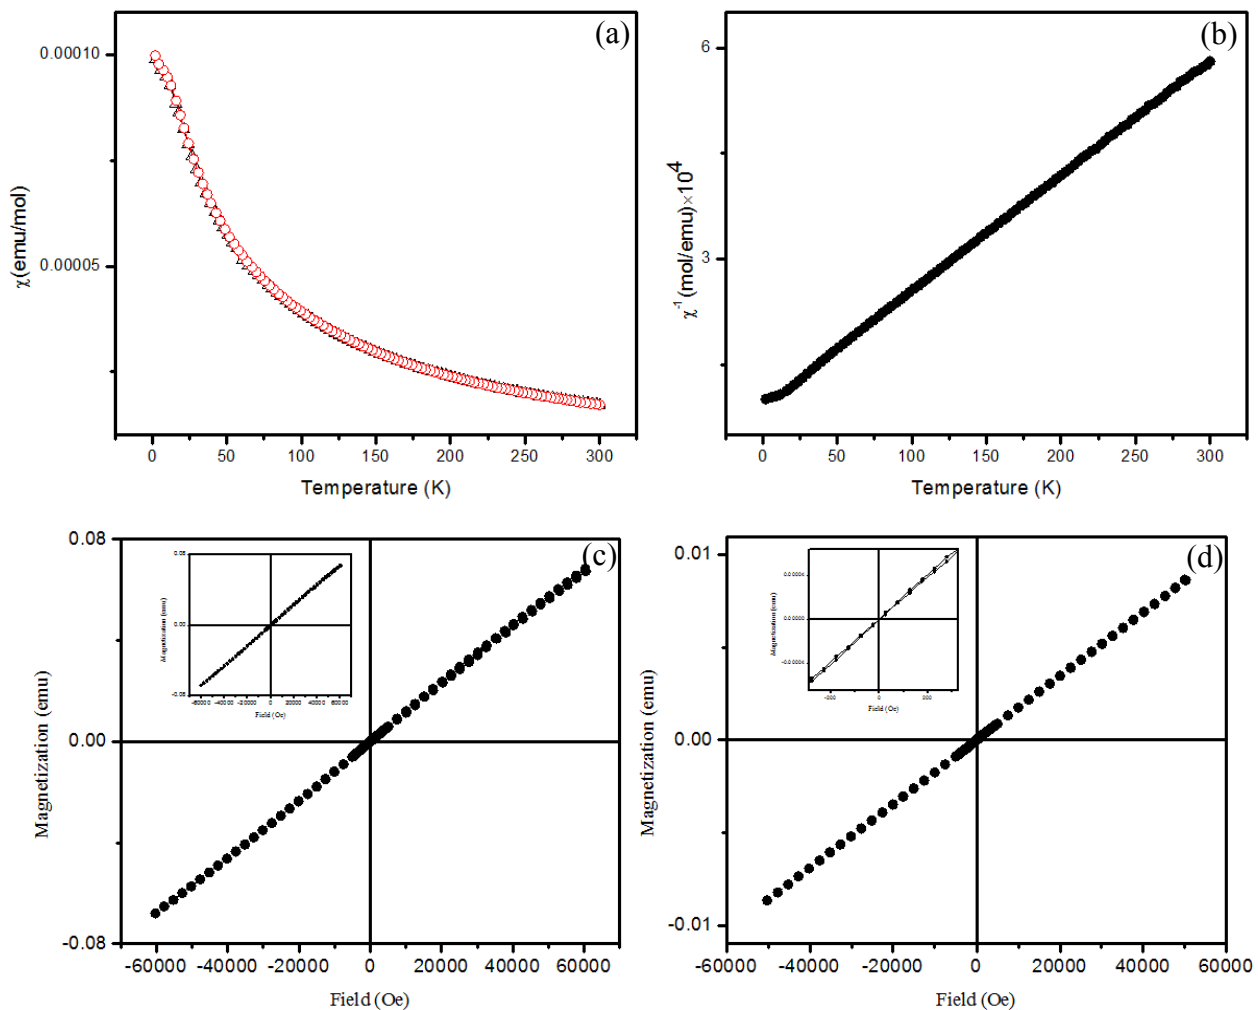

**Fig. S8:** (a) Temperature dependence of magnetic susceptibility and (b) reverse susceptibility of CsPrNb<sub>2</sub>O<sub>7</sub>. Measurements were carried out on cooling at a constant field of 100 Oe. (red circle shows FC and occluded black triangle shows ZFC). The magnetization vs the magnetic field for CsPrNb<sub>2</sub>O<sub>7</sub> at (c) 2 K and (d) 300 K.

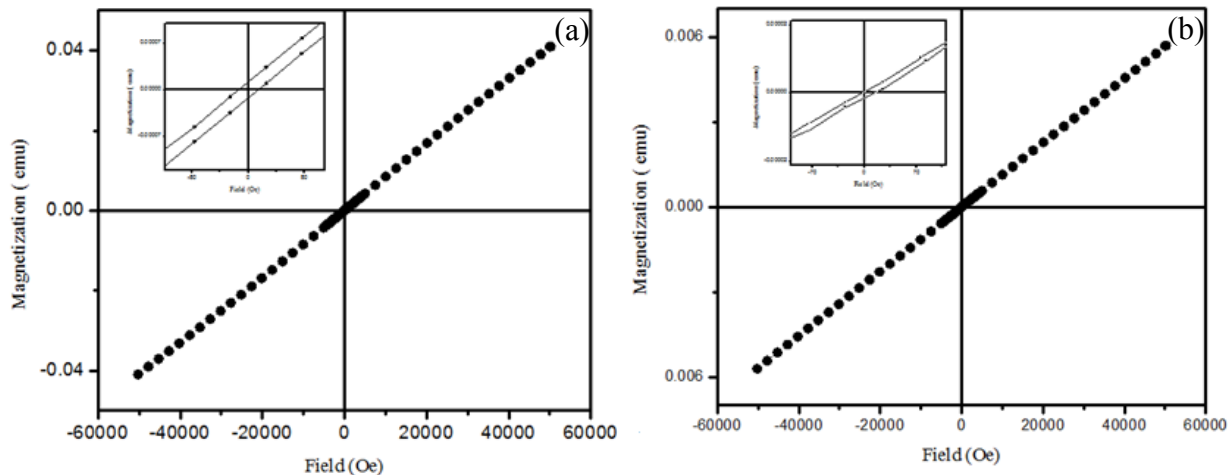

**Fig. S9:** The magnetization vs the magnetic field for RbPrNb<sub>2</sub>O<sub>7</sub> at (a) 4K and (b) 300 K.

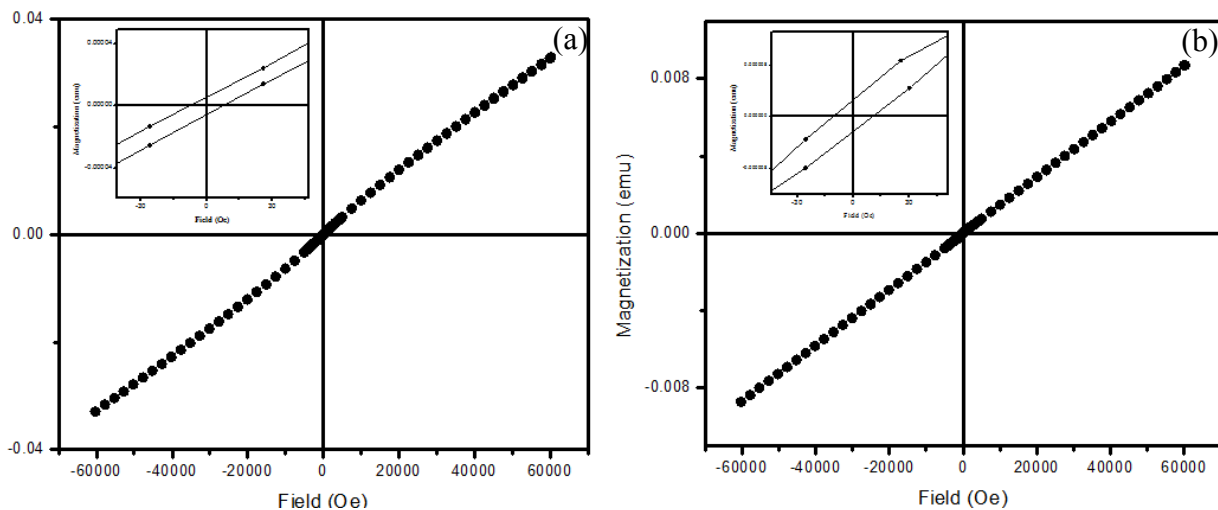

**Fig. S10:** The magnetization versus magnetic field for (CuCl)PrNb<sub>2</sub>O<sub>7</sub> at (a) 2 K (inset shows slight hysteresis of 15 Oe) and (b) 300 K (inset, hysteresis of 40 Oe).

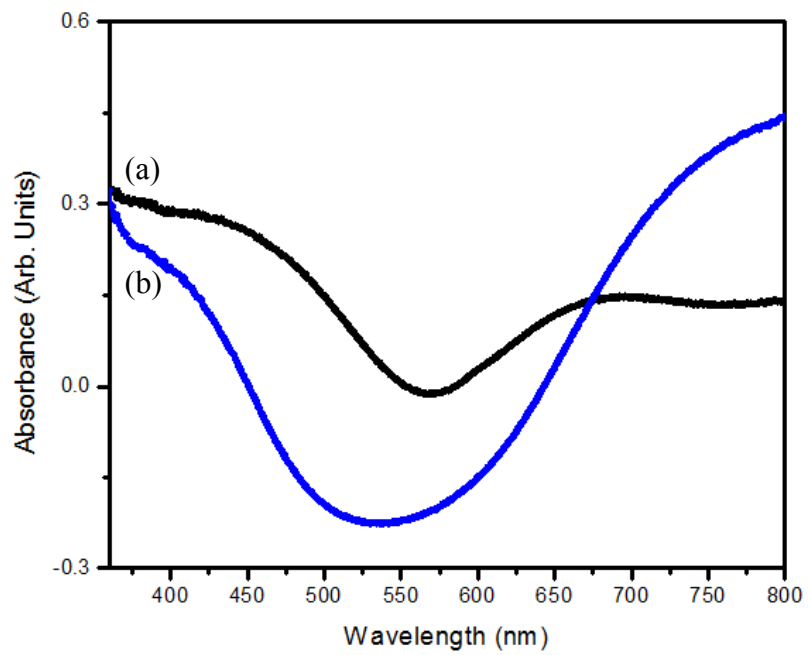

**Fig. S11:** UV-Vis spectra of the (a)  $\text{CuCl}_2 \cdot 2\text{H}_2\text{O}$  and (b)  $(\text{CuCl})\text{PrNb}_2\text{O}_7$ .

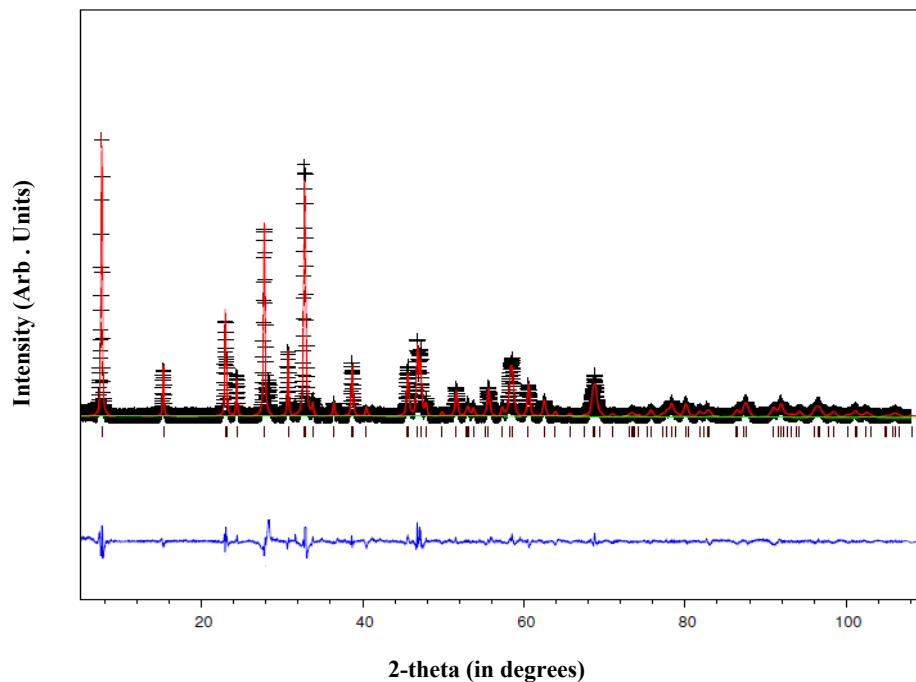

**Fig. S12:** Refinement of (CuCl)PrNb<sub>2</sub>O<sub>7</sub> in *P4/mmm* space group. Observed and calculated data for the Rietveld refinement of (CuCl)PrNb<sub>2</sub>O<sub>7</sub>. Observed data are indicated by crosses, calculated pattern by a red solid line, and the bottom blue curve is the difference plot. Peak positions are presented by black dot color. ( $Z=1$ ;  $a=3.86421(9)$  Å,  $c=11.6782(2)$  Å  $V= 174.381(8)$  Å<sup>3</sup>;  $R_p=11.52\%$   $R_{wp}= 8.64\%$  and  $\chi^2= 6.172$ .) Orthorhombic model in *Pbam* space group was superior.

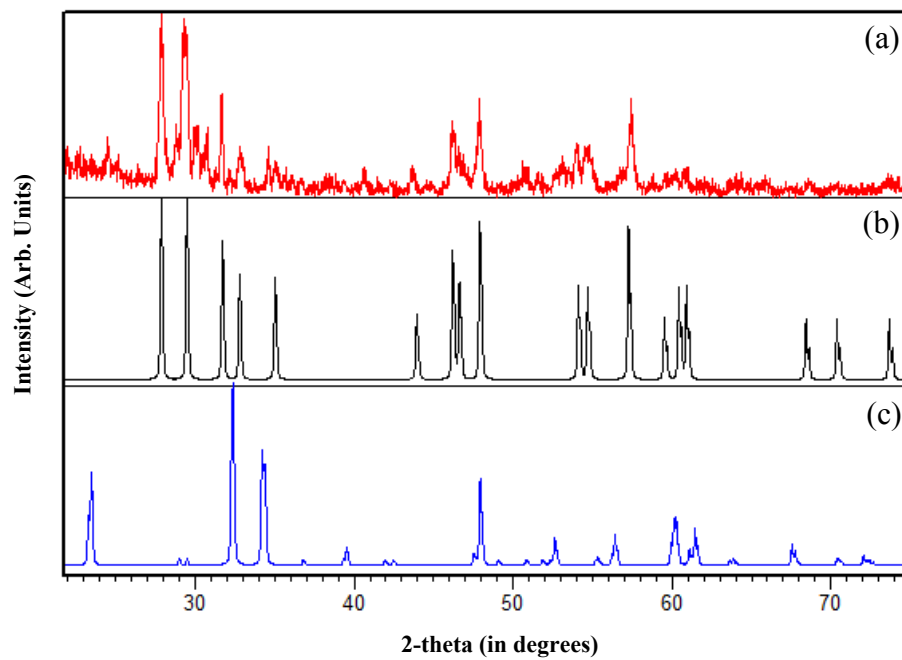

**Fig. S13:** XRD of  $(\text{CuCl})\text{PrNb}_2\text{O}_7$  after TGA/DTA (a) at 1000 °C, (b)  $\text{PrNbO}_4$  and (c)  $\text{CuNbO}_3$ .
